# Supplementary material for: Transient expression of ZBTB32 in anti-viral CD8+ T cells limits the magnitude of the effector response and the generation of memory
Source: PubMed Central journal article supplement (PMC5578684; doi:10.1371/journal.ppat.1006544), 2017-08-21
Supplement: ppat.1006544.s002.pdf [file ppat.1006544.s002.pdf]

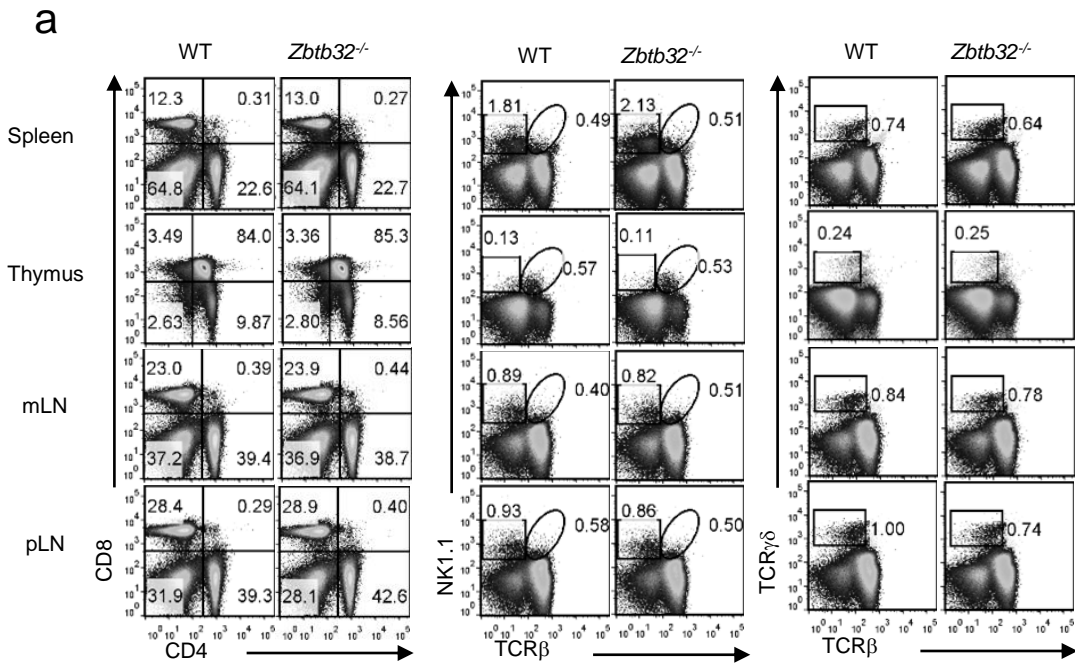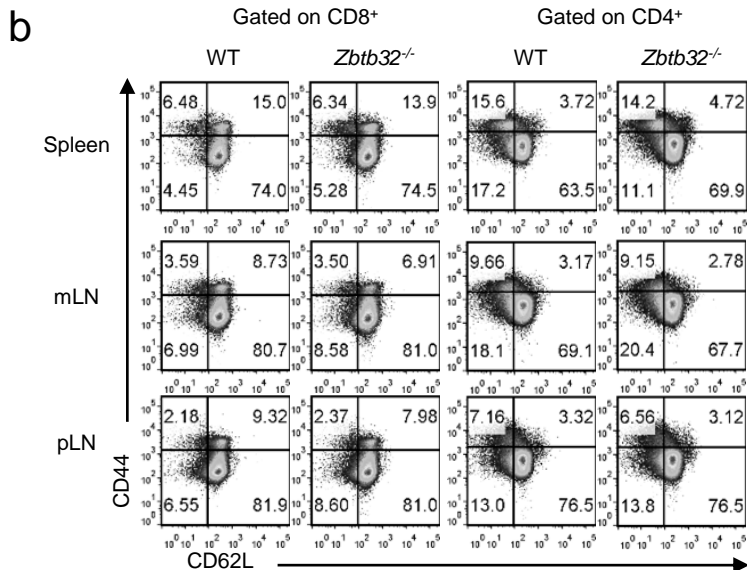

**S2 Fig. Characterization of immune subsets in uninfected *Zbtb32*<sup>-/-</sup> mice.**

(a) Spleen, thymus, mesenteric lymph nodes (mLN) and peripheral lymph nodes (pLN) from WT and *Zbtb32*<sup>-/-</sup> mice were analyzed by flow cytometry to characterize T cell subsets. Representative data are shown.

(b) The proportions of naive (CD44<sup>lo</sup> CD62L<sup>hi</sup>), effector (CD44<sup>hi</sup>, CD62L<sup>lo</sup>) and memory (CD44<sup>hi</sup> CD62L<sup>hi</sup>) CD8<sup>+</sup> and CD4<sup>+</sup> T cell subsets in spleen, mesenteric lymph nodes (mLN) and peripheral lymph nodes (pLN) of representative WT and *Zbtb32*<sup>-/-</sup> mice are shown.
