# Supplementary material for: Transient expression of ZBTB32 in anti-viral CD8+ T cells limits the magnitude of the effector response and the generation of memory
Source: PubMed Central journal article supplement (PMC5578684; doi:10.1371/journal.ppat.1006544), 2017-08-21
Supplement: ppat.1006544.s003.pdf [file ppat.1006544.s003.pdf]

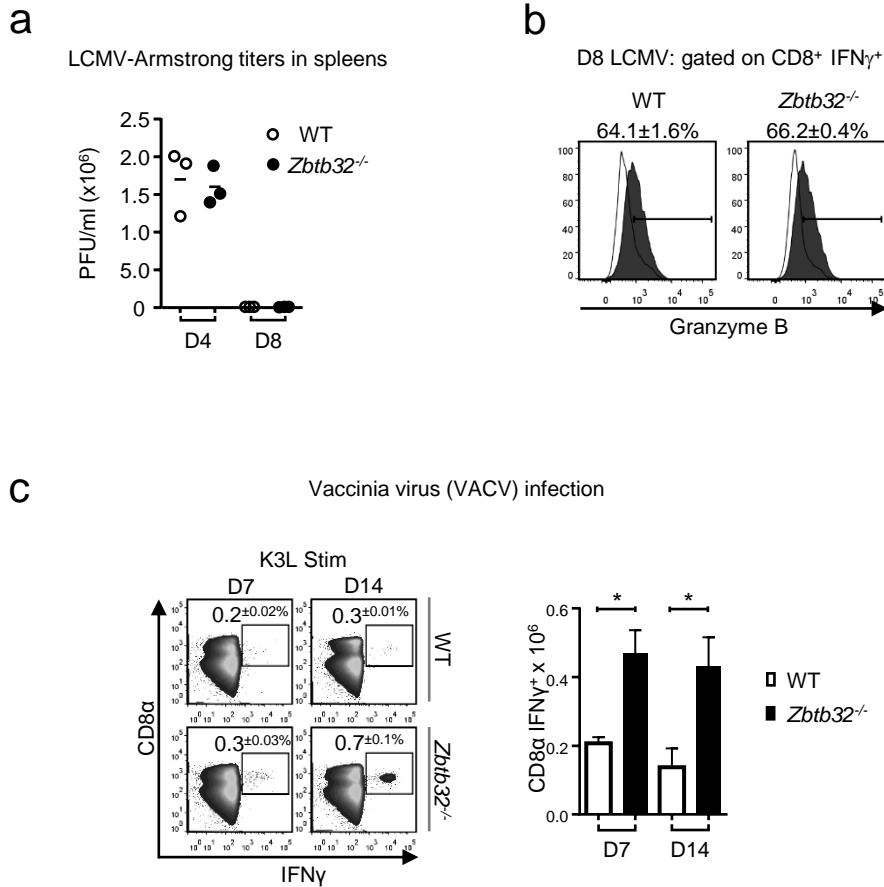

**S3 Fig. Characterization of anti-viral immune responses in *Zbtb32*<sup>-/-</sup> mice.**

(a) LCMV-Armstrong titers in spleens of infected WT and *Zbtb32*<sup>-/-</sup> mice were determined by plaque assay at days 4 and 8 post-infection. Data are representative of two independent experiments.

(b) Splenocytes were isolated at day 8 from LCMV-infected WT and *Zbtb32*<sup>-/-</sup> mice and were stimulated with GP33 peptide followed by intracellular cytokine staining. Percentages  $\pm$  SEM of granzyme B<sup>+</sup> of IFN $\gamma$ -producing virus-specific CD8<sup>+</sup> T cells are depicted. The open graphs show a negative control of granzyme B on IFN $\gamma$ -non-producing cells. Data are representative of three independent experiments with three mice per genotype per experiment.

(c) Splenocytes from day 7 and 14 VACV-infected WT and *Zbtb32*<sup>-/-</sup> mice were stimulated with VACV-specific K3L peptides followed by intracellular cytokine staining. Percentages  $\pm$  SEM (left panels) or absolute numbers  $\pm$  SEM (right graphs) of VACV-specific CD8<sup>+</sup> T cells are depicted. Data are representative of two independent experiments with three mice per genotype per experiment.
