# Supplementary material for: Transient expression of ZBTB32 in anti-viral CD8+ T cells limits the magnitude of the effector response and the generation of memory
Source: PubMed Central journal article supplement (PMC5578684; doi:10.1371/journal.ppat.1006544), 2017-08-21
Supplement: ppat.1006544.s004.pdf [file ppat.1006544.s004.pdf]

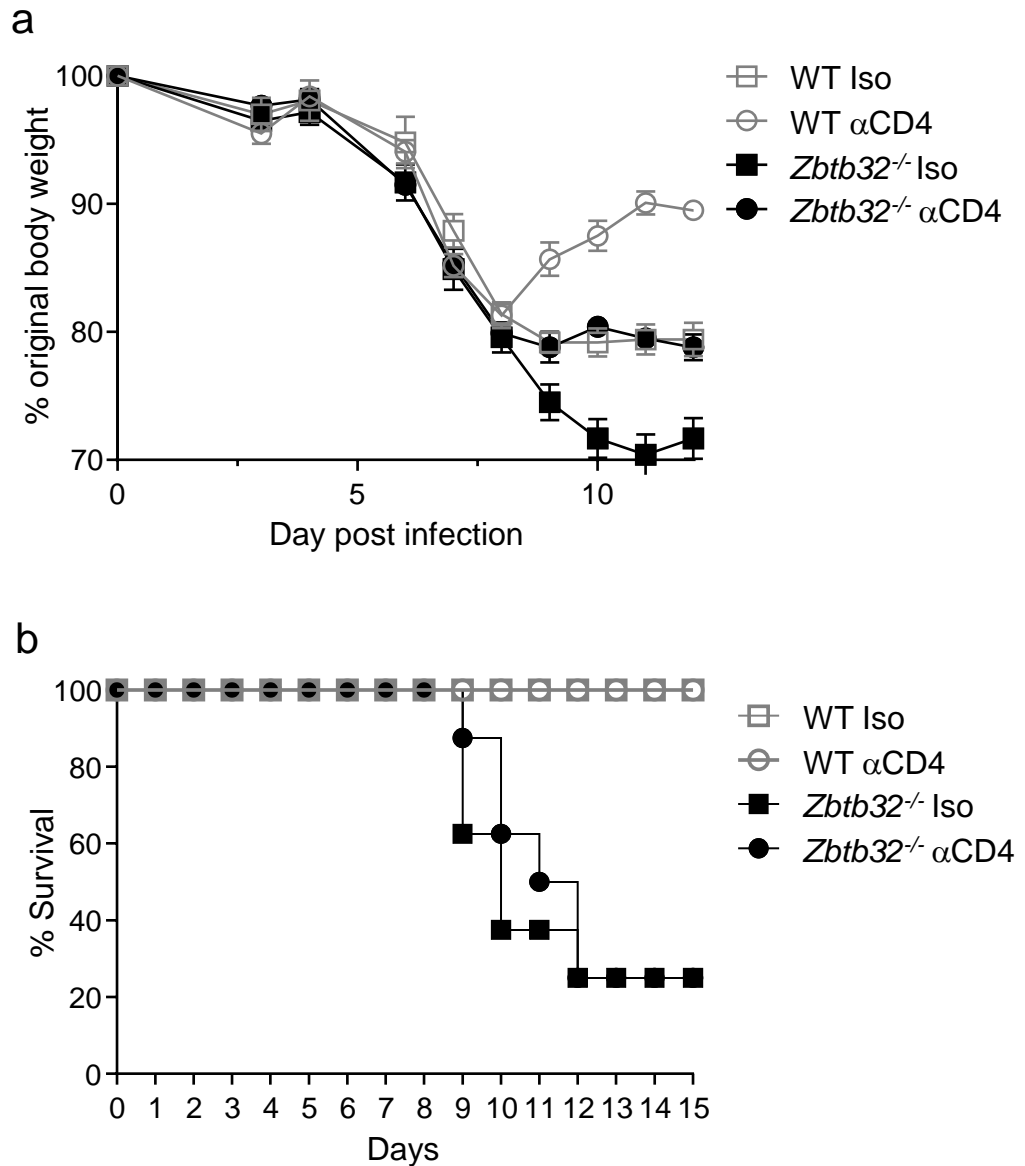

**S4 Fig. Enhanced immuno-pathology in *Zbtb32*<sup>-/-</sup> mice following LCMV-clone 13 infection is not dependent on CD4<sup>+</sup> T cells.**

(a,b) WT and *Zbtb32*<sup>-/-</sup> mice were depleted of CD4<sup>+</sup> T cells by i.p. injection of either anti-CD4 ( $\alpha$ CD4) or control IgG2b (Iso) at day -1 and day 3 of LCMV-clone 13 infection. The percentage of original body weight  $\pm$  SEM (a) and percent survival (b) of mice were recorded as indicated. Data were generated with 6 mice for WT Iso, 4 mice for WT  $\alpha$ CD4, 8 mice for *Zbtb32*<sup>-/-</sup> Iso and 8 mice for *Zbtb32*<sup>-/-</sup>  $\alpha$ CD4 conditions.
