# Supplementary material for: Transient expression of ZBTB32 in anti-viral CD8+ T cells limits the magnitude of the effector response and the generation of memory
Source: PubMed Central journal article supplement (PMC5578684; doi:10.1371/journal.ppat.1006544), 2017-08-21
Supplement: ppat.1006544.s006.pdf [file ppat.1006544.s006.pdf]

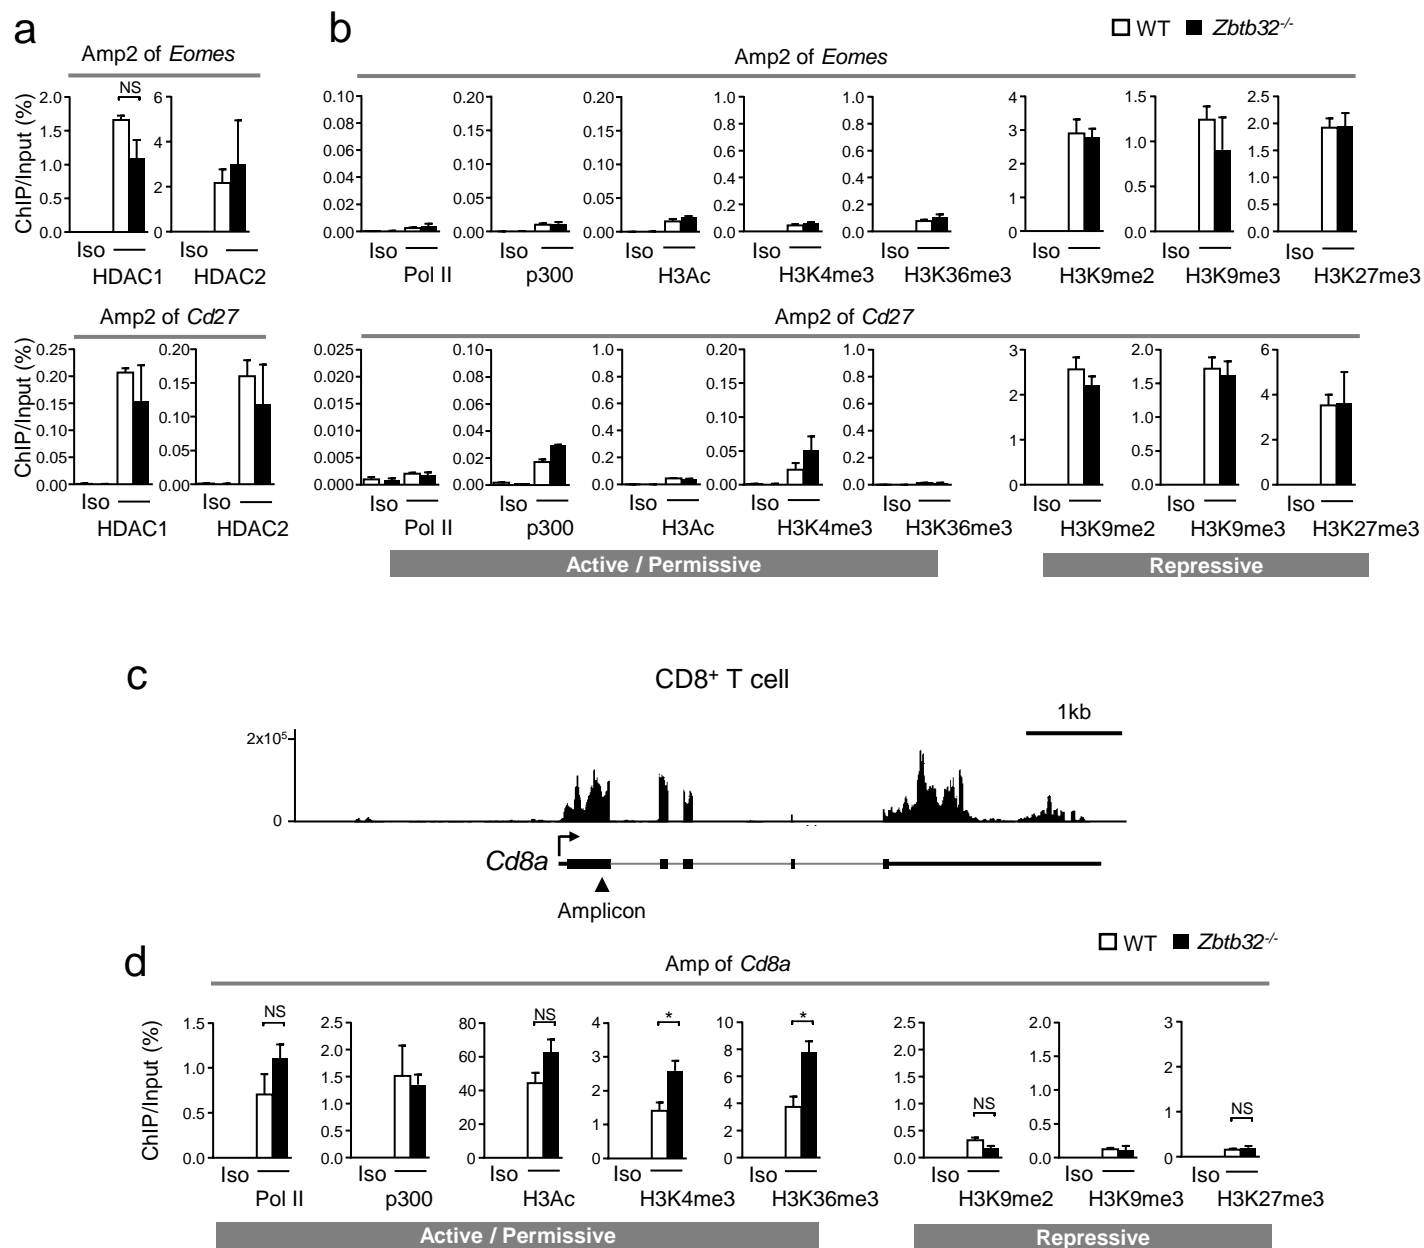

**S6 Fig. Chromatin immunoprecipitation data from control regions of *Eomes*, *Cd27* and *CD8a* genes.**

WT and *Zbtb32*<sup>-/-</sup> P14 splenocytes were transferred into recipients, which were then infected with LCMV-Armstrong. Chromatin was prepared at day 7 post-infection. ChIP assays were performed with the indicated antibodies and ChIP eluates were amplified by Q-PCR for target gene loci.

(a) The enrichment of HDAC1 and HDAC1 on negative control regions (Amp2) of *Eomes* (upper) and *Cd27* (lower) genes.

(b) ChIP for Pol II, p300 or modified histone H3 on negative control regions (Amp2) of *Eomes* (upper) and *Cd27* (lower) genes.

(c) RNA-Seq profile on *Cd8a* gene locus in naïve CD8<sup>+</sup> T cells. The original sequence data were obtained from the ImmGen consortium website ([www.immgen.org](http://www.immgen.org)) and visualized in the UCSC genome browser. The PCR amplicon (Amp) for the ChIP assays is indicated. (d) ChIP for Pol II, p300 or modified histone H3 on the *Cd8a* gene locus. Iso, isotype control antibody. Data are a compilation of three independent experiments; error bars represent the SEM.
