# Supplementary material for: Transient expression of ZBTB32 in anti-viral CD8+ T cells limits the magnitude of the effector response and the generation of memory
Source: PubMed Central journal article supplement (PMC5578684; doi:10.1371/journal.ppat.1006544), 2017-08-21
Supplement: ppat.1006544.s008.pdf [file ppat.1006544.s008.pdf]

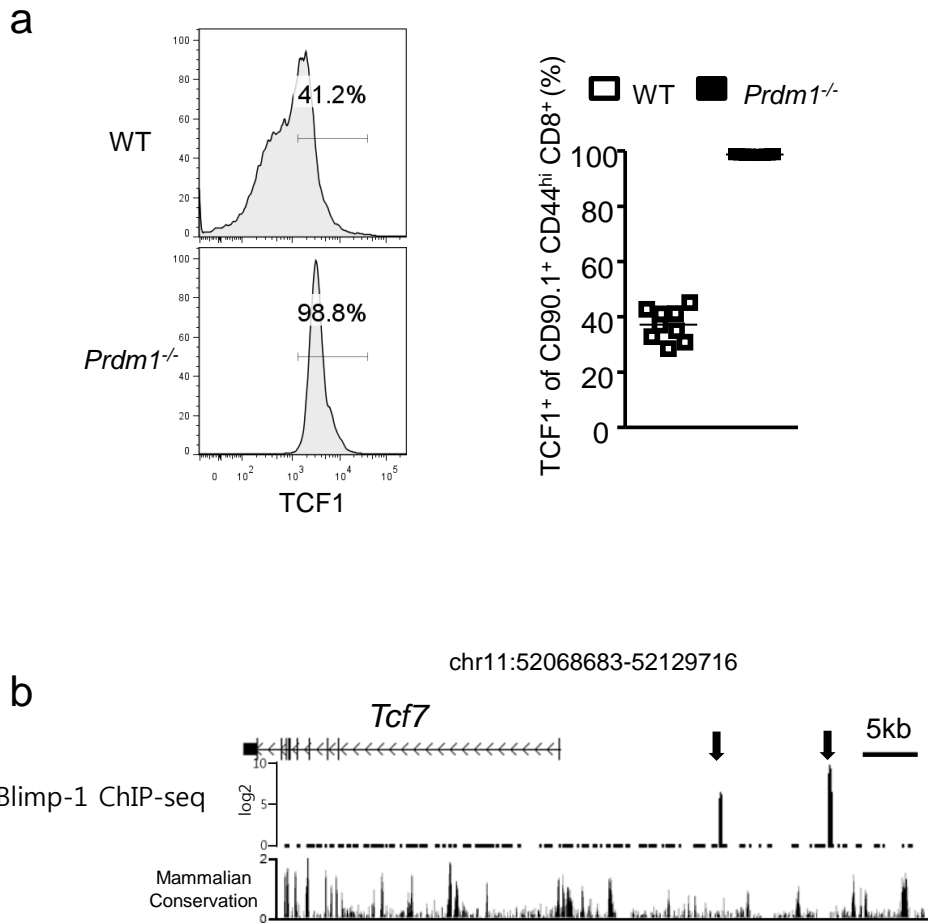

**S8 Fig. Blimp-1 regulates TCF1 expression in CD8<sup>+</sup> T cells.**

(a) WT or *Prdm1*<sup>-/-</sup> P14 splenocytes (5x10<sup>4</sup>, CD90.1<sup>+</sup>) were adoptively transferred into CD90.2<sup>+</sup> recipient mice followed by LCMV-Armstrong infection. At day 10 post-transfer and infection, P14 CD90.1<sup>+</sup> cells were analyzed for TCF1 expression by intracellular staining followed by flow cytometry, and a compilation of data is shown at right.

(b) Identification of Blimp-1 binding sites on the *Tcf7* gene. The scale bar indicates the relative kb scale and the numbers on the right display the magnitude of sequence enrichment on a log<sub>2</sub> scale. Peaks were identified with Cisgenome 2.0, and all enrichment data on Blimp-1 binding sites are shown in the ChIP-seq tracks (15). Placental mammalian basewise conservation by PhyloP for the *Tcf7* gene locus is displayed below.
