# Supplementary material for: Transient expression of ZBTB32 in anti-viral CD8+ T cells limits the magnitude of the effector response and the generation of memory
Source: PubMed Central journal article supplement (PMC5578684; doi:10.1371/journal.ppat.1006544), 2017-08-21
Supplement: ppat.1006544.s009.pdf [file ppat.1006544.s009.pdf]

## Primers for Quantitative RT-PCR

| Gene          | Primer     | Sequence                            | Gene        | Primer     | Sequence                             |
|---------------|------------|-------------------------------------|-------------|------------|--------------------------------------|
| <i>Prdm1</i>  | Sense      | 5'-GAC GGG GGT ACT TCT GTT CA-3'    | <i>Irf4</i> | Sense      | 5'-CAC AGC TCA TGT GGA ACC TCT-3'    |
|               | Anti-sense | 5'-GGC ATT CTT GGG AAC TGT GT-3'    |             | Anti-sense | 5'-GCG GTG GTA ATC TGG AGT GG-3'     |
| <i>Eomes</i>  | Sense      | 5'-GGG ACA ACT ACG ATT CAT CCC A-3' | <i>Irf8</i> | Sense      | 5'-CGT GGA AGA CGA GGT TAC GCT G-3'  |
|               | Anti-sense | 5'-GCA CGG TTC TCT CAC CGT TA-3'    |             | Anti-sense | 5'-GCT GAA TGG TGT GTG TCA TAG GC-3' |
| <i>Zbtb32</i> | Sense      | 5'-CCC ACT CCA GGA TCT TTT CCC-3'   | <i>Bcl6</i> | Sense      | 5'-CTG CAG ATG GAG CAT GTT GT-3'     |
|               | Anti-sense | 5'-TGA CTC ACA CAG GTT GCC AG-3'    |             | Anti-sense | 5'-CAC CCG GGA GTA TTT CTC AG-3'     |
| <i>Tbx21</i>  | Sense      | 5'-CAA CAA CCC CTT TGC CAA AG-3'    | <i>Tcf7</i> | Sense      | 5'-CCC CGA TCT CTC TGG ATT TT-3'     |
|               | Anti-sense | 5'-TCC CCC AAG CAG TTG ACA GT-3'    |             | Anti-sense | 5'-GGC AGG GAA GTG CTG TCT AT-3'     |
| <i>Id2</i>    | Sense      | 5'-ACC AGA GAC CTG GAC AGA AC-3'    | <i>Lef1</i> | Sense      | 5'-CAG CCT GTT TAT CCC ATC AC-3'     |
|               | Anti-sense | 5'-AAG CTC AGA AGG GAA TTC AG-3'    |             | Anti-sense | 5'-TCC TGT TTG ACC TGA GGT GT-3'     |
| <i>Id3</i>    | Sense      | 5'-GAC TCT GGG ACC CTC TCT C-3'     | <i>Cd7</i>  | Sense      | 5'-AGA TCA CCT GGA TTT GGG CG-3'     |
|               | Anti-sense | 5'-ACC CAA GTT CAG TCC TTC TC-3'    |             | Anti-sense | 5'-CTG GTG TAC GTC TTG GGC AT-3'     |
| <i>Irf1</i>   | Sense      | 5'-TAA CTC CAG CAC TGT CAC CGT G-3' | <i>Bcl2</i> | Sense      | 5'-CTG GAA ACC CTC CTG ATT TT-3'     |
|               | Anti-sense | 5'-TAT GCC TAT CCC AAT GTC CCC-3'   |             | Anti-sense | 5'-AAA TAT TTC AAA CGC GTC CA-3'     |

## ChIP Amplicon Primers for Quantitative PCR

| Gene          | Amplicon                      | Primer     | Sequence                                |
|---------------|-------------------------------|------------|-----------------------------------------|
| <i>Zbtb32</i> | Amplicon A                    | Sense      | 5'-GAC CTT GAC CCC TTG AGC AG -3'       |
|               |                               | Anti-sense | 5'-GGA AGC CTG TGG TGG TCT TC -3'       |
|               | Amplicon B                    | Sense      | 5'-TCG CAG GCT ATC TCT CTC TGT-3'       |
|               |                               | Anti-sense | 5'-GCT ACT TCC TCT CAC AAG GAG G-3'     |
|               | Amplicon C (negative control) | Sense      | 5'-ACC TTG CTG TAG ATG GGT GC-3'        |
|               |                               | Anti-sense | 5'-GAC AAG GGG AAC CGA AGA GG -3'       |
| <i>Eomes</i>  | Amplicon 1                    | Sense      | 5'-CCT GGT GAG CTC GGT GAA C-3'         |
|               |                               | Anti-sense | 5'-GAG ACT GCC CGG AAA CTT CT-3'        |
|               | Amplicon 2 (negative control) | Sense      | 5'-AAC GCA ACA GGG AGA GGA AG-3'        |
|               |                               | Anti-sense | 5'-CCC ATG GGG TCT CTG AAC AC-3'        |
| <i>Cd27</i>   | Amplicon 1                    | Sense      | 5'-GAG CTG AGG TCA CAG GTT CC-3'        |
|               |                               | Anti-sense | 5'-AAA GCG GCA CAC ACC AAT TC-3'        |
|               | Amplicon 2 (negative control) | Sense      | 5'-GCA GGT ATG GAG TTT GGG GT-3'        |
|               |                               | Anti-sense | 5'-GAC ATG TGC CTG TCT GAG GT-3'        |
| <i>Il2ra</i>  | Amplicon 1                    | Sense      | 5'-TCG GAG AGG GAT TCG GTA GCT TGA-3'   |
|               |                               | Anti-sense | 5'-TGA TAG CCT GCT GCT CAG AAC TGG G-3' |
|               | Amplicon 2 (negative control) | Sense      | 5'-TTA CAG CAG TGC CTC CCT TG-3'        |
|               |                               | Anti-sense | 5'-GGG AGT GAG TGG GGT TAG GA-3'        |
| <i>Cd8a</i>   | Amplicon                      | Sense      | 5'-CTG CCA TGA GGG ACA CGA AT-3'        |
|               |                               | Anti-sense | 5'-GAC TGG CAC GAC AGA ACT GA-3'        |

S9 Fig. Primers and ChIP Amplicon primers for PCR and quantitative PCR
