# Supplementary material for: Transient expression of ZBTB32 in anti-viral CD8+ T cells limits the magnitude of the effector response and the generation of memory
Source: PubMed Central journal article supplement (PMC5578684; doi:10.1371/journal.ppat.1006544), 2017-08-21
Supplement: ppat.1006544.s010.pdf [file ppat.1006544.s010.pdf]

a

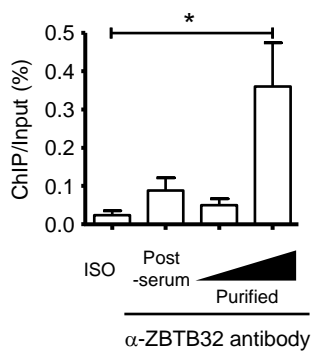

b

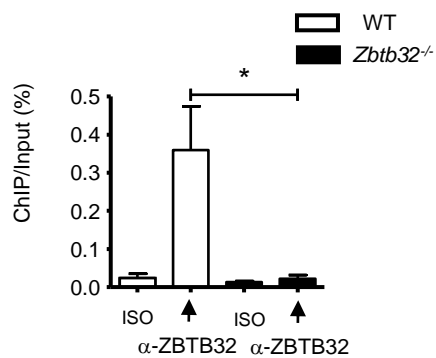

### S10 Fig. Titration of ZBTB32 antibody

WT and *Zbtb32*<sup>-/-</sup> mice were infected with LCMV-Armstrong. CD44<sup>hi</sup> CD8<sup>+</sup> T cells were isolated at day 7 post-infection, and chromatin was prepared. Purified ZBTB32-specific antibodies as described in supplemental materials and methods were used for ChIP assays (a,b). ChIP eluates were amplified by Q-PCR for the *Eomes* gene locus. Iso, isotype control antibody.
